# Supplementary material
Source: PubMed Central journal article supplement (PMC7810290)
Supplement: ehp7699.smcontents.508.pdf [file ehp7699.smcontents.508.pdf]

**Note to readers with disabilities:** *EHP* strives to ensure that all journal content is accessible to all readers. However, some figures and Supplemental Material published in *EHP* articles may not conform to [508 standards](#) due to the complexity of the information being presented. If you need assistance accessing journal content, please contact [ehp508@niehs.nih.gov](mailto:ehp508@niehs.nih.gov). Our staff will work with you to assess and meet your accessibility needs within 3 working days.

### **Supplemental Material**

#### **DNA Methylation Patterns in CD4<sup>+</sup> T Cells of Naïve and Influenza A Virus-Infected Mice Developmentally Exposed to an Aryl Hydrocarbon Receptor Ligand**

Catherine G. Burke, Jason R. Myers, Christina M. Post, Lisbeth A. Boule, and B. Paige Lawrence

#### **Table of Contents**

**Table S1.** Pathways analysis of RNA-sequencing analysis of CD4<sup>+</sup> T cells.

**Table S2.** Numerical data and p-values for Figures 2 and 3.

**Table S3.** Numerical data and p-values for Figure 4.

**Table S4.** ANOVA values global DNA methylation.

**Table S5.** Z-scores and p-values corresponding to graphs in Figure 6.

**Table S6.** Numerical data and p-values for Figure 7.

**Table S7.** Numerical data and p-values for Figure 8.

**Table S8.** Genes in adult humans and mice that were differentially methylated following early life AHR activation.

**Figure S1. Water consumption and body weight change in mice treated with DNA methylation altering drugs.** Mice were developmentally exposed to peanut oil vehicle (Veh) or TCDD (1  $\mu\text{g}/\text{kg}$  BW). At 21 days, 25 female offspring of vehicle dams, and 17 female offspring of TCDD dams were randomly assigned to 3 treatment groups: normal vivarium water (control), water containing S-adenosylmethionine (SAM; 0.5 mg/mL), or water containing Zebularine (Zeb, 0.2 mg/mL). (A) The amount of water consumed per mouse per day prior to infection. Water consumption was measured every 2 days. The amount of water consumed per mouse was calculated by recording the amount of water consumed per cage divided by the total number of mice within that cage (4-5 mice per cage). (B) Weekly weight gain from 3 weeks of age until infection. (C-E) Body weight after IAV infection in (C) all groups, (D) vehicle groups, and (E) TCDD groups was recorded for 9 days. No mice died from the infection. The number of mice in each group was as follows: control water vehicle (8), control water TCDD (5), SAM water vehicle (8), SAM water TCDD (6), Zeb water vehicle (9), and Zeb water TCDD (6). All data shown denote the mean  $\pm$  SEM. Data were analyzed by 2-way ANOVA, and F values are shown in each graph.

**Figure S2. CD4<sup>+</sup> T cell purity.** CD4<sup>+</sup> T cells were isolated using MojoSort Mouse CD4<sup>+</sup> T cell kit (BioLegend, San Diego, CA). (A) Purity of isolated CD4<sup>+</sup> T cells was determined using flow cytometry. The FACS plots depict cell enrichment from two samples, and the number on each plot denotes the mean ( $\pm$ SEM) purity of CD4<sup>+</sup> T cells from infected offspring of dams treated with vehicle control or TCDD. (B) CD4<sup>+</sup> T cell purity for individual samples from vehicle and TCDD offspring that were naïve or infected.

**Figure S3. Differential gene expression in CD4<sup>+</sup> T cell from mice exposed developmentally to TCDD or control and infected with influenza A virus.** Pregnant mice were administered vehicle or TCDD (1  $\mu\text{g}/\text{kg}$  body weight) or peanut oil vehicle control on gestational days (GD) 0, 7, 14, and 2 days after parturition (PND2). At 8-10 weeks of age, offspring were infected with influenza A virus (IAV; strain HKx31). Nine days after infection, CD4<sup>+</sup> T cells were purified, RNA isolated, and RNA-sequencing (RNA-seq) was performed. The number of differentially expressed genes (DEGs) was assessed and presented in a volcano plot.

**Figure S4. Comparison of cellular functions and pathways during IAV infection in offspring developmentally exposed to vehicle control or TCDD.** Pathways were ranked by p-value, and 20 pathways in CD4<sup>+</sup> T cells from infected vs. naïve offspring in (A) Vehicle and (B) TCDD exposure groups. Position of dots denotes relative rank in the other exposure group. The y-axis shows the pathway rank within the (A) Vehicle or (B) TCDD. A positive change in rank order indicated that pathway was found at a higher rank in the other exposure group. Open circles represent pathways that were ranked among the top 20 for both vehicle and TCDD exposure groups. In (A), filled circles represent pathways only in the vehicle. In (B), filled circles represent pathways only in the TCDD. Abbreviations: V, vehicle, T, TCDD, i, infected, n, naïve.

**Figure S5. Correlation of changes in DNA methylation and gene expression.** (A-F) Scatter plots show the correlation between change ( $\Delta$ ) in DNA methylation and fold change in differentially expressed genes (DEG) in CD4<sup>+</sup> T cells from (A-C) vehicle or (D-F) TCDD exposed offspring prior to and after infection. Correlations in (A,D) all genomic regions, (B,E) promoters, and (C,F) introns are shown. Black lines show the R<sup>2</sup> and p-value for all DEGs (all circles). Blue lines show the R<sup>2</sup> and p-value for DEGs with an inverse correlation between gene expression and DNA methylation change (open circles). The percentage of open circles is indicated above each plot.
